# Supplementary material for: Adherence to the Chinese dietary guidelines and metabolic syndrome among children aged 6–14 years
Source: Royal Society of Chemistry journal article supplement (doi:10.1039/d2fo00637e), 2022-01-01
Supplement: d2fo00637e1.pdf [file d2fo00637e1.pdf]

**Table S1.** Components of the Chinese Healthy Eating Index (CHEI) and scoring method

| <b>Components</b>            | <b>Maximum Points</b> | <b>Standard for Maximum Score</b> | <b>Standard for Zero Score</b> |
|------------------------------|-----------------------|-----------------------------------|--------------------------------|
| <b>Adequacy</b>              |                       |                                   |                                |
| Total Grains                 | 5                     | $\geq 2.5$ SP/1000 kcal           | No intake                      |
| Whole Grains and Mixed Beans | 5                     | $\geq 0.6$ SP/1000 kcal           | No intake                      |
| Tubers                       | 5                     | $\geq 0.3$ SP/1000 kcal           | No intake                      |
| Total Vegetables             | 5                     | $\geq 1.9$ SP/1000 kcal           | No intake                      |
| Dark Vegetables              | 5                     | $\geq 0.9$ SP/1000 kcal           | No intake                      |
| Fruits                       | 10                    | $\geq 1.1$ SP/1000 kcal           | No intake                      |
| Dairy                        | 5                     | $\geq 0.5$ SP/1000 kcal           | No intake                      |
| Soybeans                     | 5                     | $\geq 0.4$ SP/1000 kcal           | No intake                      |
| Fish and Seafood             | 5                     | $\geq 0.6$ SP/1000 kcal           | No intake                      |
| Poultry                      | 5                     | $\geq 0.3$ SP/1000 kcal           | No intake                      |
| Eggs                         | 5                     | $\geq 0.5$ SP/1000 kcal           | No intake                      |
| Seeds and Nuts               | 5                     | $\geq 0.4$ SP/1000 kcal           | No intake                      |
| <b>Moderation</b>            |                       |                                   |                                |
| Red Meat                     | 5                     | $\leq 0.4$ SP/1000 kcal           | $\geq 3.5$ SP/1000 kcal        |
| Cooking Oils                 | 10                    | $\leq 15.6$ g/1000 kcal           | $\geq 32.6$ g/1000 kcal        |
| Sodium                       | 10                    | $\leq 1000$ mg/1000 kcal          | $\geq 3608$ mg/1000 kcal       |
| Added Sugars                 | 5                     | $\leq 10\%$ of energy             | $\geq 20\%$ of energy          |
| Alcohol                      | 5                     | $\leq 25$ g (men)/15 g (women)    | $\geq 60$ g (men)/40 g (women) |
